# Supplementary material for: Oral mucosa - an examination map for confocal laser endomicroscopy within the oral cavity: an experimental clinical study
Source: PubMed Central journal article supplement (PMC11039507; doi:10.1007/s00784-024-05664-9), 2024-04-23
Supplement: 784_2024_5664_MOESM1_ESM.pdf [file 784_2024_5664_MOESM1_ESM.pdf]

# CLE Protocol

Measurement performed on: \_\_\_\_\_

*Patient name:* \_\_\_\_\_ *Date of birth:* \_\_\_\_\_

Smoker:       n       y, \_\_\_PY

renal retention parameters:    inconspicuous       increased

Allergies:       n       y, following: \_\_\_\_\_

$\beta$ -blocker:       n       y

Localization of the lesion:

Known precursor lesion/

Oral mucosal disease :

- Macroscopic images/photos:      Nr. : \_\_\_\_\_
- CLE with contrast agent:

Fluorescein:

**3ml**

Sequences (after X mins)

|                                   |  |
|-----------------------------------|--|
| 1. labial region                  |  |
| 2. upper alveolar process         |  |
| 3. lateral border of the tongue   |  |
| 4. floor of the mouth             |  |
| 5. hard palate                    |  |
| 6. buccal site (intercalary line) |  |
| 7. suspicious mucosal lesion      |  |

Examiner : \_\_\_\_\_
